# Supplementary figures and images for: Identifying microbe-disease association based on graph convolutional attention network: Case study of liver cirrhosis and epilepsy
Source: Frontiers journal article supplement (doi:10.3389/fnins.2022.1124315), 2023-01-19

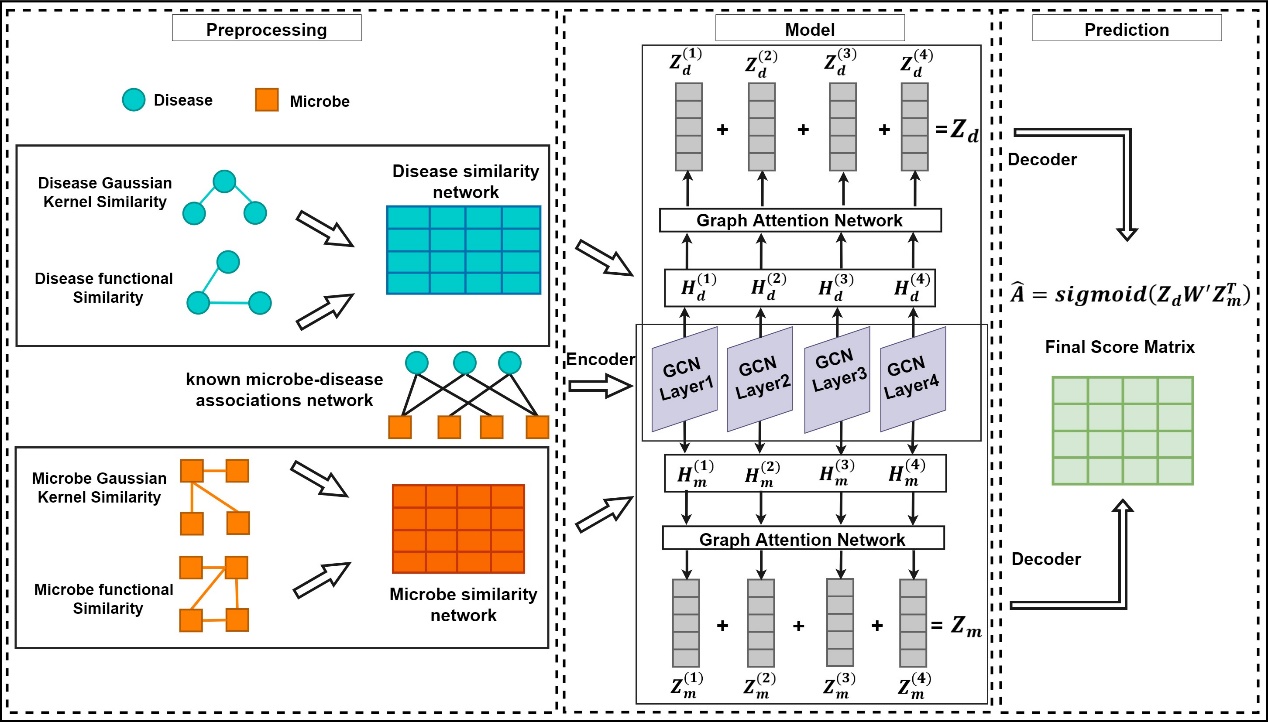


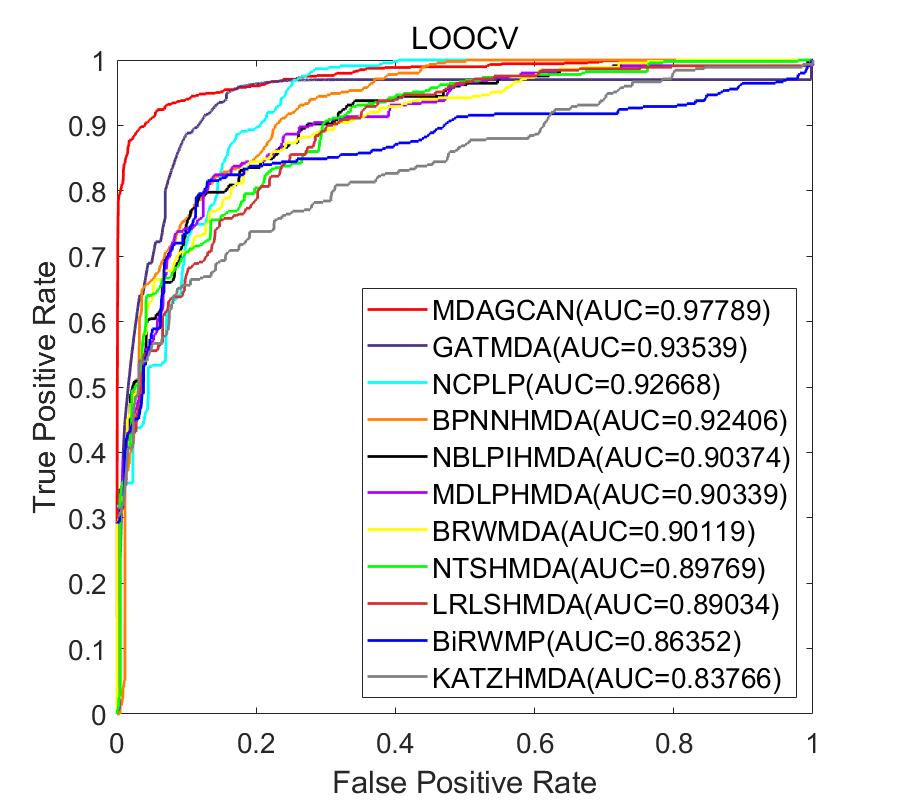

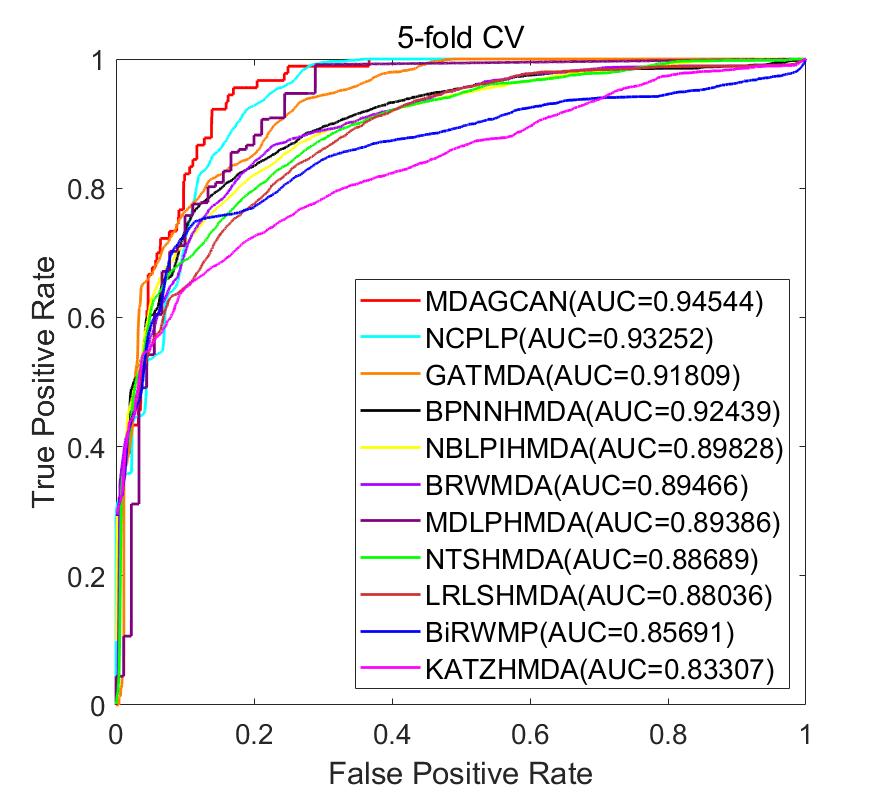


1. (B)

Supplement: Data_Sheet_1.docx [file Data_Sheet_1.docx]
